# Supplementary material for: Individualised multiplexed circulating tumour DNA assays for monitoring of tumour presence in patients after colorectal cancer surgery
Source: PubMed Central journal article supplement (PMC5244357; doi:10.1038/srep40737), 2017-01-19
Supplement: srep40737-s1.pdf [file srep40737-s1.pdf]

## **SUPPLEMENTARY INFORMATION**

for

### **Individualised multiplexed circulating tumour DNA assays for monitoring of tumour presence in patients after colorectal cancer surgery.**

Sarah B Ng<sup>1\*</sup>, Clarinda Chua<sup>2</sup>, Matthew Ng<sup>2</sup>, Anna Gan<sup>3</sup>, Polly SY Poon<sup>1</sup>, Melissa Teo<sup>4</sup>, Cherylin Fu<sup>5</sup>, Leow Wei Qiang<sup>6</sup>, Lim Kiat Hon<sup>6</sup>, Alexander Chung<sup>7</sup>, Si-Lin Koo<sup>2</sup>, Su Pin Choo<sup>2</sup>, Danliang Ho<sup>2</sup>, Steve Rozen<sup>8</sup>, Patrick Tan<sup>8,9</sup>, Mark Wong<sup>5</sup>, William F Burkholder<sup>1</sup>, Iain Beehuat Tan<sup>\*2,3,8</sup>

<sup>1</sup>Microfluidics Systems Biology, Institute of Molecular and Cell Biology, Singapore

<sup>2</sup>Division of Medical Oncology, National Cancer Centre Singapore, Singapore

<sup>3</sup>Genome Institute of Singapore, Singapore

<sup>4</sup>Division of Surgical Oncology, National Cancer Centre Singapore, Singapore

<sup>5</sup>Department of Colorectal Surgery, <sup>6</sup>Department of Pathology, <sup>7</sup>Department of Hepatopancreatobiliary / Transplant Surgery, Singapore General Hospital, Singapore

<sup>8</sup>Cancer & Stem Cell Biology Program, Duke-NUS Medical School, Singapore

<sup>9</sup>Cancer Science Institute, National University of Singapore, Singapore

<sup>^</sup>Current affiliation: Genome Institute of Singapore, Singapore

<sup>\*</sup>Correspondence to: Sarah Ng (ngbhs@gis.a-star.edu.sg) and Iain Tan (iain.tan.b.h@singhealth.com.sg)

**Supplementary Figures S1-S4**

**Supplementary Table S1**

**Supplementary Figure S1: Number of somatic mutations identified in 44 patient tumours.**

The number of mutations in each sample is given on the diagonal (range: 8 – 2245), and as well as the number of mutations any pairwise samples share (lightly shaded boxes, maximum is 1). Mutations which are shared among at least three samples are specifically identified (A-F).

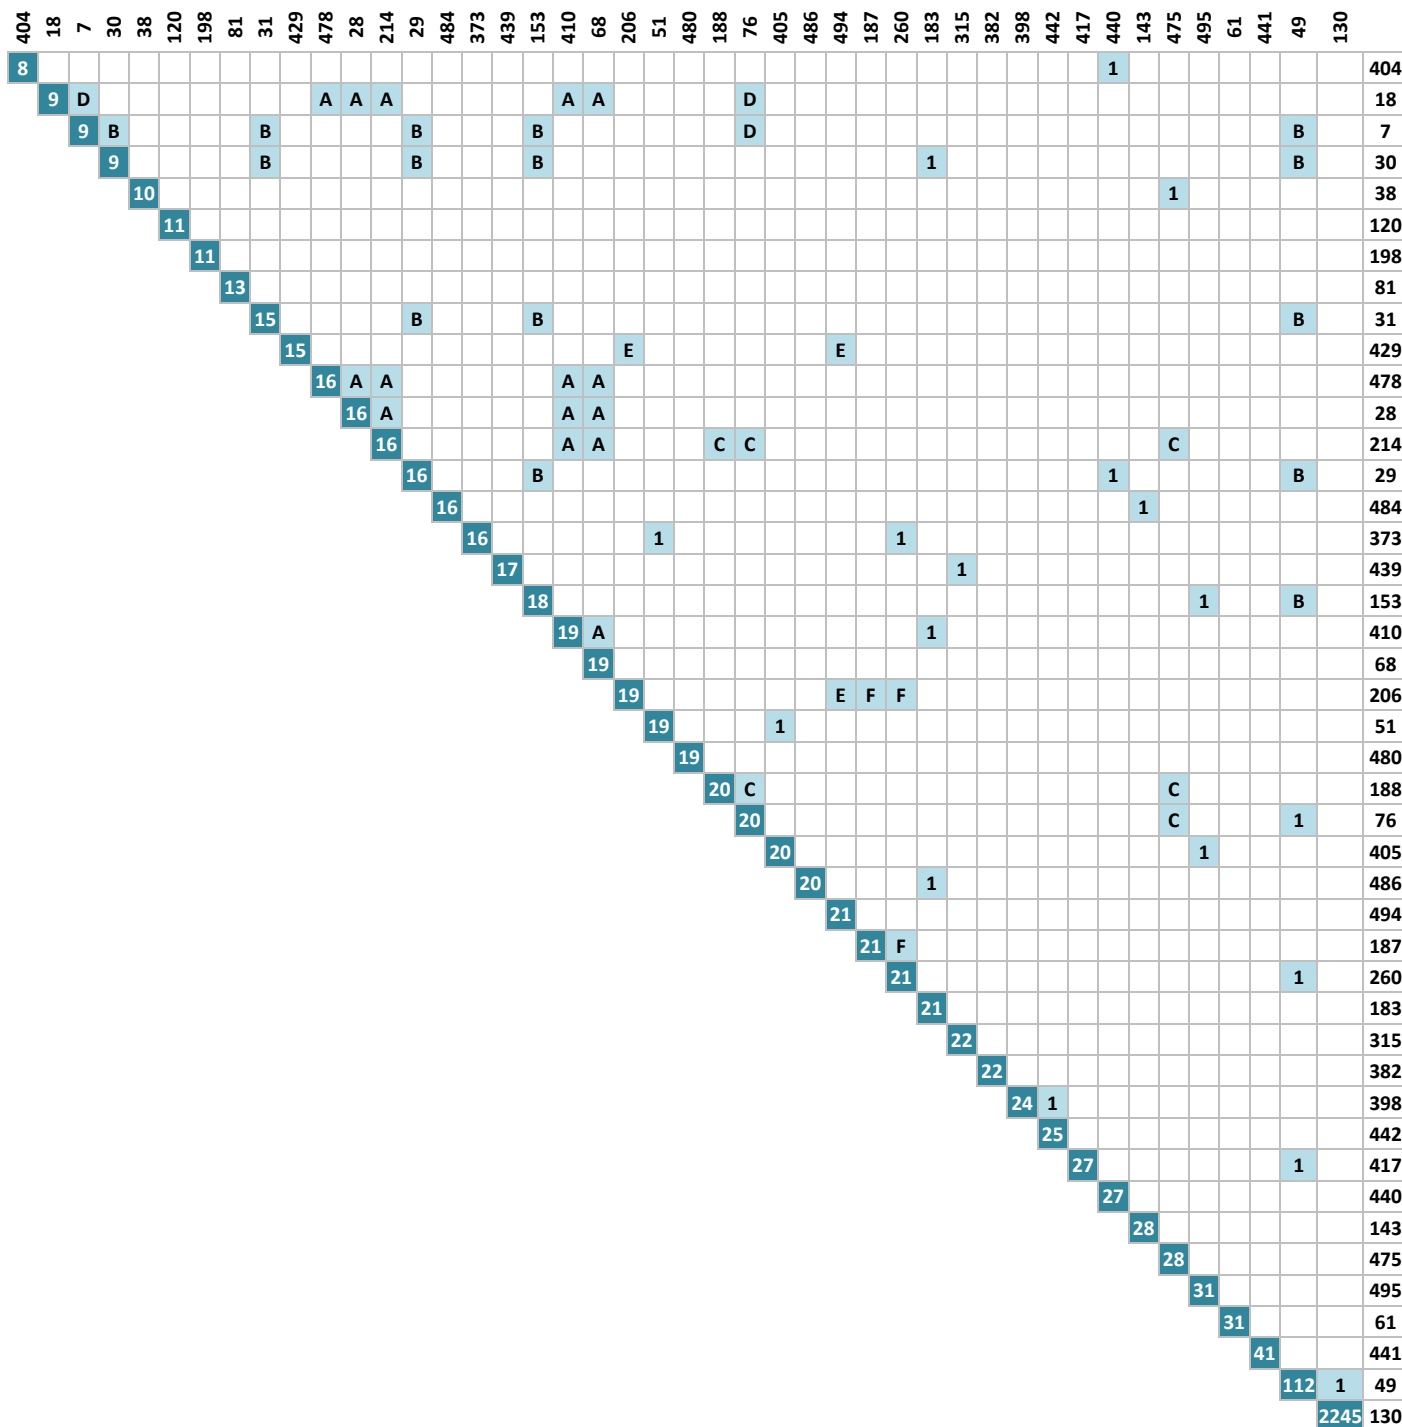

|   | Gene | Mutation | Samples with mutation |
|---|------|----------|-----------------------|
| A | KRAS | G12V     | 6                     |
| B | KRAS | G13D     | 6                     |
| C | TP53 | R273H    | 4                     |
| D | APC  | R232X    | 3                     |
| E | TP53 | R273C    | 3                     |
| F | APC  | R876X    | 3                     |

**Supplementary Figure S2: Concordance of somatic mutation allele frequency as estimated by targeted sequencing and amplicon sequencing**

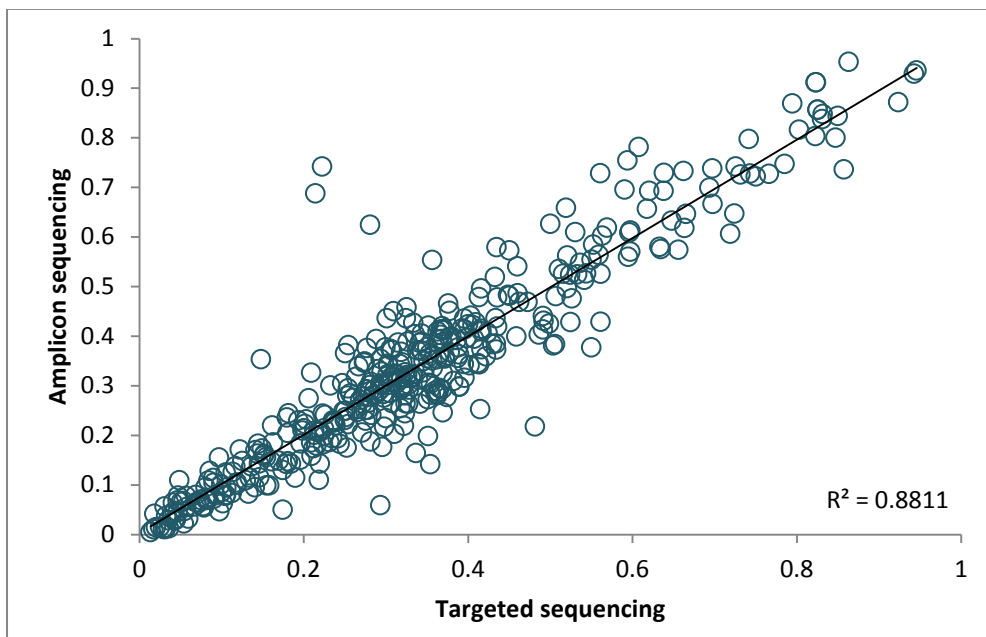

**Supplementary Figure S3: ROC curve of positive and negative amplicons based on plasma samples from patients and healthy volunteers respectively.**

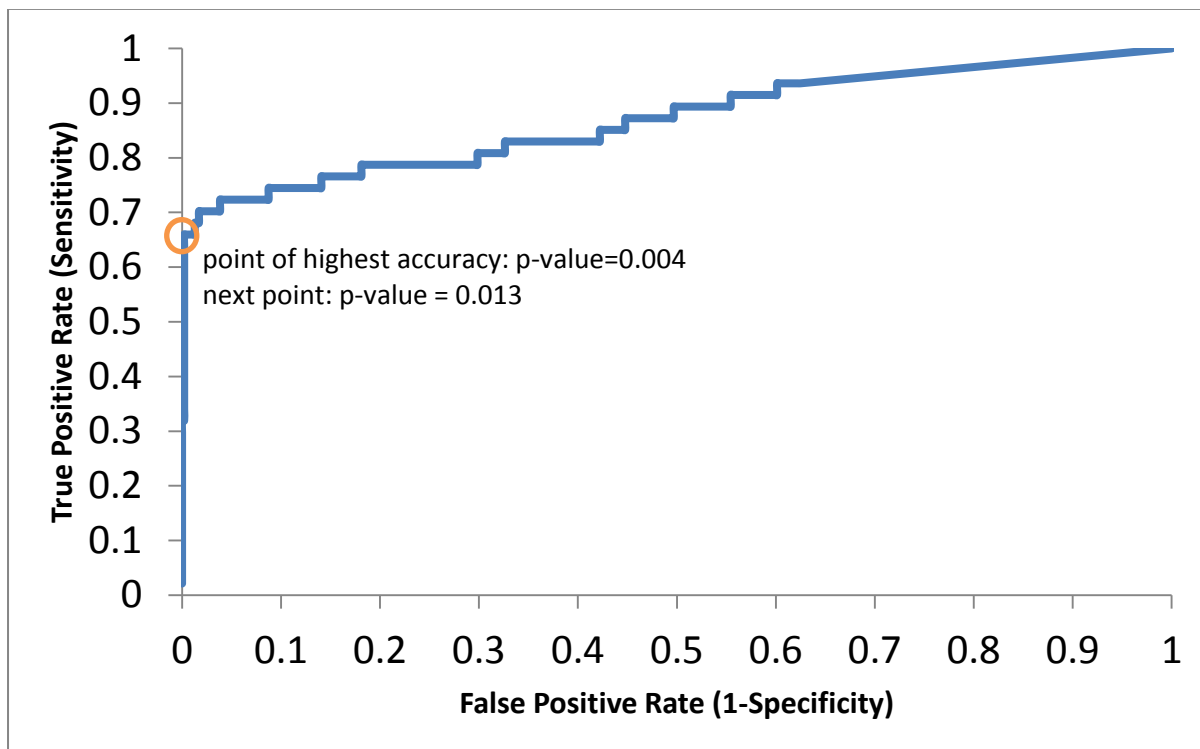

**Supplementary Figure S4: Histogram of Pearson correlation coefficients between observed and expected variant frequencies over 326 amplicons in 44 tumour dilution series.**

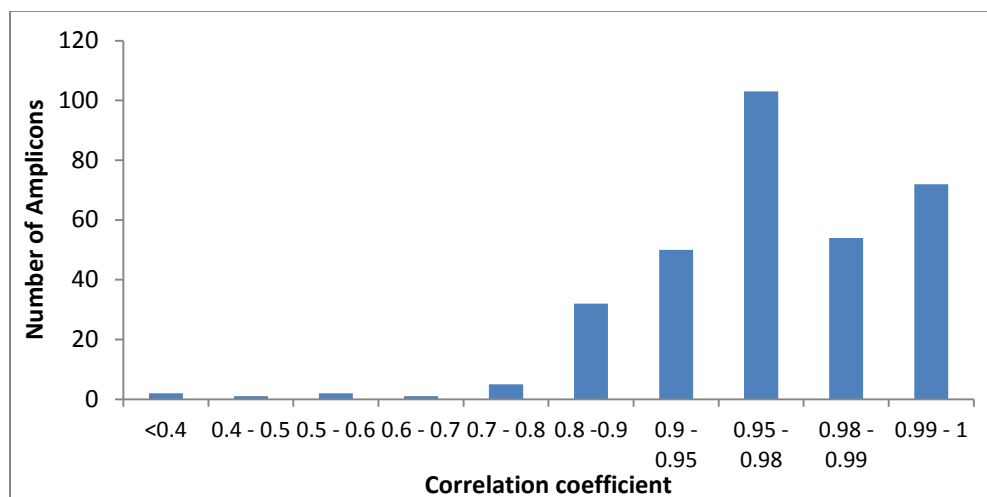

**Supplementary Table S1: Patient characteristics including availability of plasma samples and ctDNA detection at selected clinical events.**

| Patient | Total number of plasma samples | Age | Gender | Stage of primary tumor (T Stage/N stage [no. of lymph nodes involved/no. of lymph nodes harvested]) | Site of primary tumor | Pre-primary-surgery plasma available? | ctDNA detected in pre-primary-surgery plasma? | Post-operative (within 1 week) plasma available? | ctDNA detected in post-operative plasma? | Did patient develop recurrence? | Site of recurrence                    | Plasma samples prior to/at recurrence after primary surgery available? | ctDNA detected pre-recurrence? | Metastectomy / surgery for recurrent disease performed? | Was there recurrence post-metastectomy? | Site of recurrence post-metastectomy | Plasma samples available prior to/at recurrence after metastectomy available? | ctDNA detected pre-recurrence? |
|---------|--------------------------------|-----|--------|-----------------------------------------------------------------------------------------------------|-----------------------|---------------------------------------|-----------------------------------------------|--------------------------------------------------|------------------------------------------|---------------------------------|---------------------------------------|------------------------------------------------------------------------|--------------------------------|---------------------------------------------------------|-----------------------------------------|--------------------------------------|-------------------------------------------------------------------------------|--------------------------------|
| 417     | 2                              | 68y | Male   | T1N0 [0/8]                                                                                          | Sigmoid Colon         | y                                     | n                                             | y                                                | n                                        | n                               | NA                                    |                                                                        |                                |                                                         |                                         |                                      |                                                                               |                                |
| 441     | 14                             | 77y | Male   | T3N1 [1/11]                                                                                         | Sigmoid Colon         | y                                     | n                                             | y                                                | n                                        | n                               | NA                                    |                                                                        |                                |                                                         |                                         |                                      |                                                                               |                                |
| 494     | 3                              | 69y | Male   | T4aN2 [4/16]                                                                                        | Sigmoid Colon         | y                                     | y                                             | y                                                | y                                        | metastatic at diagnosis         | NA (metastatic to liver at diagnosis) |                                                                        |                                |                                                         |                                         |                                      |                                                                               |                                |
| 440     | 2                              | 77y | Male   | T3N0 [0/19]                                                                                         | Ascending Colon       | y                                     | y                                             | y                                                | n                                        | n                               | NA                                    |                                                                        |                                |                                                         |                                         |                                      |                                                                               |                                |
| 478     | 2                              | 64y | Female | T3N0 [0/21]                                                                                         | transverse colon      | y                                     | y                                             | y                                                | n                                        | n                               | NA                                    |                                                                        |                                |                                                         |                                         |                                      |                                                                               |                                |
| 480     | 2                              | 61y | Male   | T3N0 [0/19]                                                                                         | Sigmoid Colon         | y                                     | y                                             | y                                                | n                                        | n                               | NA                                    |                                                                        |                                |                                                         |                                         |                                      |                                                                               |                                |
| 495     | 2                              | 61y | Male   | T3N0 [0/15]                                                                                         | Descending colon      | y                                     | y                                             | y                                                | n                                        | n                               | NA                                    |                                                                        |                                |                                                         |                                         |                                      |                                                                               |                                |
| 130     | 10                             | 59y | Male   | T3N0 [0/12]                                                                                         | Rectum                | y                                     | y                                             | y                                                | n                                        | n                               | NA                                    |                                                                        |                                |                                                         |                                         |                                      |                                                                               |                                |
| 206     | 9                              | 63y | Male   | T3N1c [0/11+ satellite nodule]                                                                      | Rectum                | y                                     | y                                             | y                                                | n                                        | n                               | NA                                    |                                                                        |                                |                                                         |                                         |                                      |                                                                               |                                |
| 486     | 4                              | 59y | Male   | T4bN0 [0/14]                                                                                        | Sigmoid Colon         | y                                     | y                                             | y                                                | n                                        | n                               | NA                                    |                                                                        |                                |                                                         |                                         |                                      |                                                                               |                                |
| 405     | 13                             | 62y | Male   | T2N1 [2/13]                                                                                         | Rectum                | y                                     | y                                             | y                                                | n                                        | y                               | Lung                                  | y                                                                      | n                              | y                                                       | y                                       | Liver + Local                        | y                                                                             | y                              |
| 442     | 1                              | 67y | Female | T3N0 [0/12]                                                                                         | Descending colon      | y                                     | y                                             | n                                                |                                          | n                               | NA                                    |                                                                        |                                |                                                         |                                         |                                      |                                                                               |                                |
| 410     | 1                              | 60y | Female | T2N2 [5/21]                                                                                         | Rectum                | y                                     | y                                             | n                                                |                                          | n                               | NA                                    |                                                                        |                                |                                                         |                                         |                                      |                                                                               |                                |
| 76      | 11                             | 55y | Male   | T3N1 [3/21]                                                                                         | Sigmoid Colon         |                                       |                                               |                                                  |                                          | y                               | Liver                                 | y                                                                      | y                              | y                                                       | y                                       | Liver                                | y                                                                             | y                              |
| 28      | 12                             | 66y | Male   | T3N2 [4/24]                                                                                         | Rectum                |                                       |                                               |                                                  |                                          | y                               | Lung and Bone                         | y                                                                      | y                              |                                                         |                                         |                                      |                                                                               |                                |
| 120     | 23                             | 64y | Female | T4aN2 [9/15]                                                                                        | Rectosigmoid Colon    |                                       |                                               |                                                  |                                          | y                               | Peritoneum and Lung                   | y                                                                      | y                              |                                                         |                                         |                                      |                                                                               |                                |
| 214     | 13                             | 66y | Male   | T3N0 [0/12]                                                                                         | Transverse Colon      |                                       |                                               |                                                  |                                          | y                               | Lung, Liver and Peritoneum            | y                                                                      | y                              |                                                         |                                         |                                      |                                                                               |                                |
| 475     | 9                              | 56y | Male   | T3N1 [2/17]                                                                                         | Rectum                |                                       |                                               |                                                  |                                          | y                               | Lung                                  | y                                                                      | y                              |                                                         |                                         |                                      |                                                                               |                                |
| 30      | 1                              | 47y | Female | T4aN2 [6/14]                                                                                        | Sigmoid Colon         |                                       |                                               |                                                  |                                          | y                               | Right and Left Ovary and Tube         | y                                                                      | y                              |                                                         |                                         |                                      |                                                                               |                                |
| 429     | 1                              | 60y | Male   | T2N0 [0/8]                                                                                          | Rectosigmoid Colon    |                                       |                                               |                                                  |                                          | y                               | Liver                                 | y                                                                      | y                              |                                                         |                                         |                                      |                                                                               |                                |
| 153     | 11                             | 66y | Male   | T3N1 [1/18]                                                                                         | Sigmoid Colon         |                                       |                                               |                                                  |                                          | y                               | Lung                                  | y                                                                      | n                              |                                                         |                                         |                                      |                                                                               |                                |
| 382     | 1                              | 64y | Female | T3N2 [7/24]                                                                                         | Ascending Colon       |                                       |                                               |                                                  |                                          | y                               | Brain                                 | y                                                                      | n                              |                                                         |                                         |                                      |                                                                               |                                |

**Supplementary Table 1 (continued): Patient characteristics including availability of plasma samples and ctDNA detection at selected clinical events.**

| Patient                                                    | Total number of plasma samples | Age | Gender | Stage of primary tumor (T Stage/N stage [no. of lymph nodes involved/no. of lymph nodes harvested]) | Site of primary tumor | Pre-primary-surgery plasma available? | ctDNA detected in pre-primary-surgery plasma? | Post-operative (within 1 week) plasma available? | ctDNA detected in post-operative plasma? | Did patient develop recurrence? | Site of recurrence                                      | Plasma samples prior to/at recurrence after primary surgery available? | ctDNA detected pre-recurrence? | Metastectomy / surgery for recurrent disease performed? | Was there recurrence post-metastectomy? | Site of recurrence post-metastectomy | Plasma samples available prior to/at recurrence after metastectomy available? | ctDNA detected pre-recurrence? |  |
|------------------------------------------------------------|--------------------------------|-----|--------|-----------------------------------------------------------------------------------------------------|-----------------------|---------------------------------------|-----------------------------------------------|--------------------------------------------------|------------------------------------------|---------------------------------|---------------------------------------------------------|------------------------------------------------------------------------|--------------------------------|---------------------------------------------------------|-----------------------------------------|--------------------------------------|-------------------------------------------------------------------------------|--------------------------------|--|
| 143                                                        | 3                              | 59y | Female | T4aN0 [0/15]                                                                                        | Sigmoid Colon         |                                       |                                               |                                                  |                                          | y                               | Peritoneum , Small bowel and Omentum                    | n                                                                      |                                | y                                                       | y                                       | Peritoneum                           | y                                                                             | y                              |  |
| 187                                                        | 3                              | 72y | Male   | T3N0 [0/33]                                                                                         | Sigmoid Colon         |                                       |                                               |                                                  |                                          | y                               | Anastomosis, para-aortic nodules and peritoneal disease | n                                                                      |                                | y                                                       | y                                       | Peritoneum                           | y                                                                             | y                              |  |
| 68                                                         | 1                              | 59y | Male   | T2N0 [0/10]                                                                                         | Sigmoid Colon         |                                       |                                               |                                                  |                                          | y                               | Liver                                                   | n                                                                      |                                | y                                                       | y                                       | Liver                                | y                                                                             | n                              |  |
| 404                                                        | 1                              | 45y | Male   | T3N0 [0/12]                                                                                         | Sigmoid Colon         |                                       |                                               |                                                  |                                          | y                               | Liver                                                   | n                                                                      |                                | y                                                       | y                                       | Liver                                |                                                                               |                                |  |
| 484                                                        | 4                              | 55y | Female | T3N0 [0/12]                                                                                         | Transverse Colon      |                                       |                                               |                                                  |                                          | y                               | Liver                                                   | n                                                                      |                                | y                                                       | n                                       |                                      |                                                                               |                                |  |
| 315                                                        | 4                              | 55y | Male   | T4aN0 [0/39]                                                                                        | Rectum                |                                       |                                               |                                                  |                                          | y                               | lymph node + local recurrence                           | n                                                                      |                                | y                                                       | n                                       |                                      |                                                                               |                                |  |
| 398                                                        | 3                              | 73y | Male   | T3N1 [3/21]                                                                                         | Rectum                |                                       |                                               |                                                  |                                          | y                               | lymph node + local recurrence                           | n                                                                      |                                | y                                                       | n                                       |                                      |                                                                               |                                |  |
| 31                                                         | 2                              | 64y | Male   | T3N2 [8/22]                                                                                         | Rectum                |                                       |                                               |                                                  |                                          | y                               | Lung                                                    | n                                                                      |                                |                                                         |                                         |                                      |                                                                               |                                |  |
| 38                                                         | 12                             | 61y | Male   | T4aN2 [7/14]                                                                                        | Caecum                |                                       |                                               |                                                  |                                          | y                               | Liver, LN                                               | n                                                                      |                                |                                                         |                                         |                                      |                                                                               |                                |  |
| 51                                                         | 9                              | 64y | Male   | T3N2 [12/21]                                                                                        | Rectosigmoid Colon    |                                       |                                               |                                                  |                                          | y                               | Lung                                                    | n                                                                      |                                |                                                         |                                         |                                      |                                                                               |                                |  |
| 260                                                        | 20                             | 71y | Male   | T3N1 [2/17]                                                                                         | Sigmoid Colon         |                                       |                                               |                                                  |                                          | y                               | Lymph nodes                                             | n                                                                      |                                |                                                         |                                         |                                      |                                                                               |                                |  |
| 29                                                         | 4                              | 45y | Male   | T4aN1 [3/13]                                                                                        | Rectosigmoid Colon    |                                       |                                               |                                                  |                                          | y                               | Liver                                                   | n                                                                      |                                |                                                         |                                         |                                      |                                                                               |                                |  |
| 183                                                        | 7                              | 60y | Male   | T3N2 [6/24]                                                                                         | Sigmoid Colon         |                                       |                                               |                                                  |                                          | y                               | Peritoneum and Spleen                                   | n                                                                      |                                |                                                         |                                         |                                      |                                                                               |                                |  |
| 198                                                        | 7                              | 63y | Female | T4aN1 [1/29]                                                                                        | Ascending Colon       |                                       |                                               |                                                  |                                          | y                               | Ovary                                                   | n                                                                      |                                |                                                         |                                         |                                      |                                                                               |                                |  |
| 373                                                        | 4                              | 58y | Female | T3N2 [5/30]                                                                                         | Splenic Flexure       |                                       |                                               |                                                  |                                          | y                               | Ovary                                                   | n                                                                      |                                |                                                         |                                         |                                      |                                                                               |                                |  |
| 7                                                          | 1                              | 73y | Male   | T3N1 [1/10]                                                                                         | Rectum                |                                       |                                               |                                                  |                                          | y                               | Lung                                                    | n                                                                      |                                |                                                         |                                         |                                      |                                                                               |                                |  |
| 81                                                         | 6                              | 51y | Male   | T3N1 [2/16]                                                                                         | Rectum                |                                       |                                               |                                                  |                                          | y                               | Lung                                                    | n                                                                      |                                |                                                         |                                         |                                      |                                                                               |                                |  |
| 18                                                         | 2                              | 59y | Male   | T3N1 [1/13]                                                                                         | Sigmoid Colon         |                                       |                                               |                                                  |                                          | y                               | Liver                                                   | n                                                                      |                                |                                                         |                                         |                                      |                                                                               |                                |  |
| 439                                                        | 13                             | 61y | Male   | T4aN2b [10/12]                                                                                      | Rectosigmoid Colon    |                                       |                                               |                                                  |                                          | y                               | Lymph nodes                                             | n                                                                      |                                |                                                         |                                         |                                      |                                                                               |                                |  |
| 61                                                         | 1                              | 53y | Male   | T3N0 [0/15]                                                                                         | Rectum                |                                       |                                               |                                                  |                                          | y                               | Liver and Lung                                          | n                                                                      |                                |                                                         |                                         |                                      |                                                                               |                                |  |
| 188                                                        | 2                              | 67y | Male   | T3N1 [12/46]                                                                                        | Sigmoid Colon         |                                       |                                               |                                                  |                                          | y                               | Liver                                                   | n                                                                      |                                |                                                         |                                         |                                      |                                                                               |                                |  |
| <i>Patient removed from further analysis due to mix-up</i> |                                |     |        |                                                                                                     |                       |                                       |                                               |                                                  |                                          |                                 |                                                         |                                                                        |                                |                                                         |                                         |                                      |                                                                               |                                |  |
| 47                                                         | 4                              | 54y | Male   | T4bN0 [0/12]                                                                                        | Transverse Colon      |                                       |                                               |                                                  |                                          | y                               | Liver                                                   |                                                                        |                                | y                                                       | n                                       |                                      |                                                                               |                                |  |
